# Supplementary material
Source: HighWire-hosted journal article supplement (https://thorax.bmj.com/content/78/9/882)
Supplement: inline-supplementary-material-3 [file inline-supplementary-material-3.pdf]

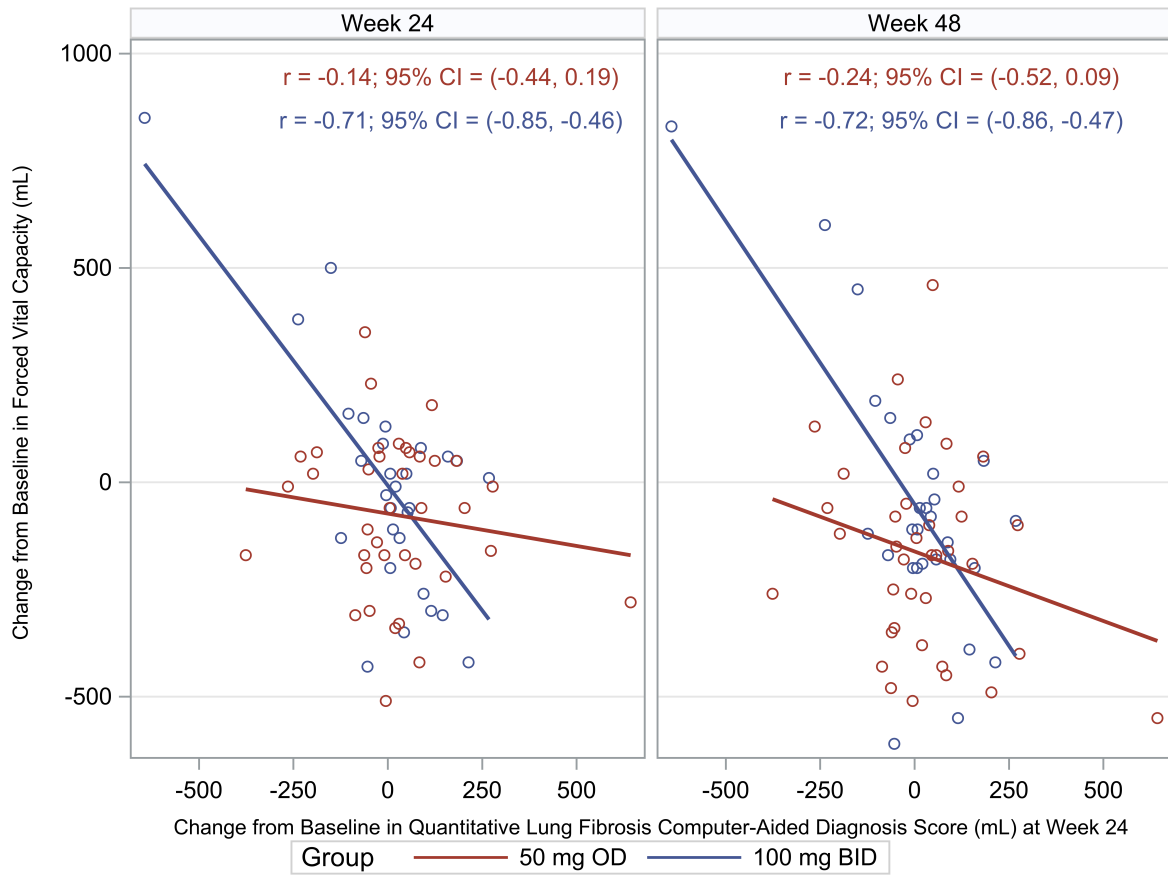

**Supplementary Figure 1: Correlation of change from baseline in quantitative lung fibrosis computer-aided diagnosis score in whole lung at week 24 with change from baseline in forced vital capacity at weeks 24 and 48**  
BID=twice daily. CI=confidence interval. OD=once daily. r=Pearson correlation coefficient.
